# Supplementary material for: Anion and pH induced spontaneous resolution of Δ- and Λ-[M(H2Biim)3]SO4 (M = Ru2+, Co2+, Ni2+, Mn2+, Fe2+, and Zn2+) enantiomers
Source: Royal Society of Chemistry journal article supplement (doi:10.1039/c2ce26334c), 2012-01-01
Supplement: c2ce26334c.pdf [file c2ce26334c.pdf]

**Anion and pH induced spontaneous resolution of  $\Delta$ - and  $\Lambda$ -[M(H<sub>2</sub>Biim)<sub>3</sub>]SO<sub>4</sub>**

**(M=Ru<sup>2+</sup>, Co<sup>2+</sup>, Ni<sup>2+</sup>, Mn<sup>2+</sup>, Fe<sup>2+</sup>, and Zn<sup>2+</sup>) enantiomers**

Yu-Hui Tan,<sup>a,b</sup> Jin-Ji Wu,<sup>a</sup> Hai-Yun Zhou,<sup>c</sup> Li-Fei Yang<sup>a</sup> and Bao-Hui Ye<sup>\*,a</sup>

<sup>a</sup> MOE Laboratory of Bioinorganic and Synthetic Chemistry, School of Chemistry and Chemical Engineering, Sun Yat-Sen University, Guangzhou 510275, China; <sup>b</sup> School of Metallurgy and Chemical Engineering, Jiangxi University of Science and Technology, Ganzhou 341000, China; and <sup>c</sup> Instrumental Analysis and Research Center, Sun Yat-Sen University, Guangzhou 510275, China.

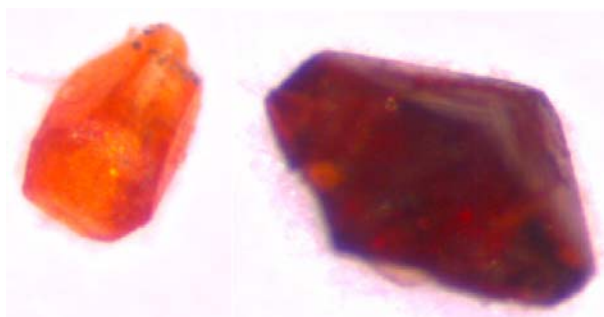

Fig. S1. Photographs showing the shapes of  $\Lambda$ -2 (left) and  $\Delta$ -2 (right) under a microscope.

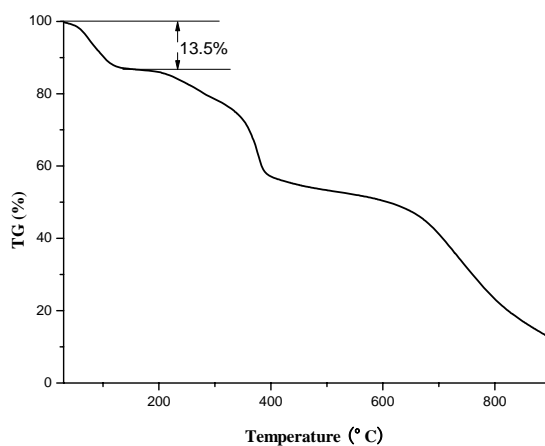

Fig. S2. TGA of *rac*-2·5H<sub>2</sub>O.

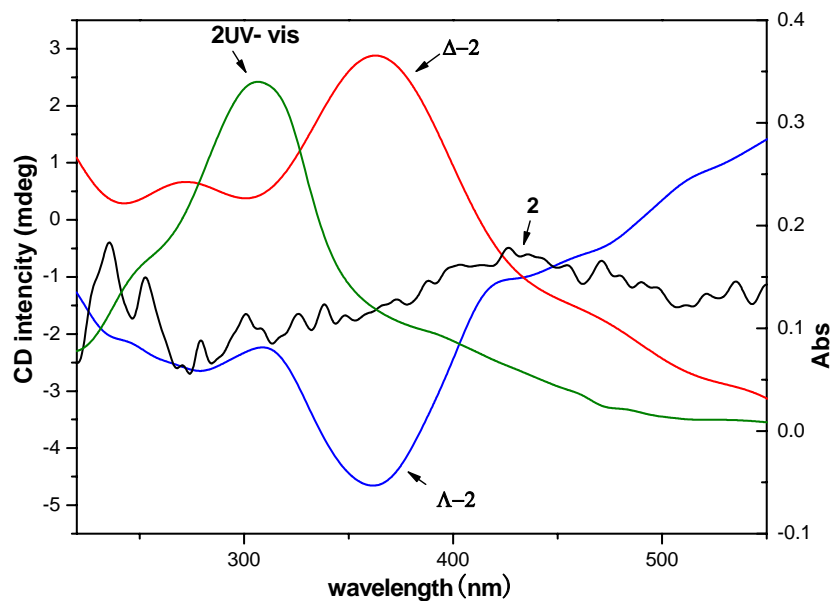

**Fig. S3.** Solid state CD spectra of a large single crystal of  $\Lambda$ -2 (blue line),  $\Delta$ -2 (red line), *rac*-2 (black line), and UV-vis spectra of **2** (green line) diluted with KCl.

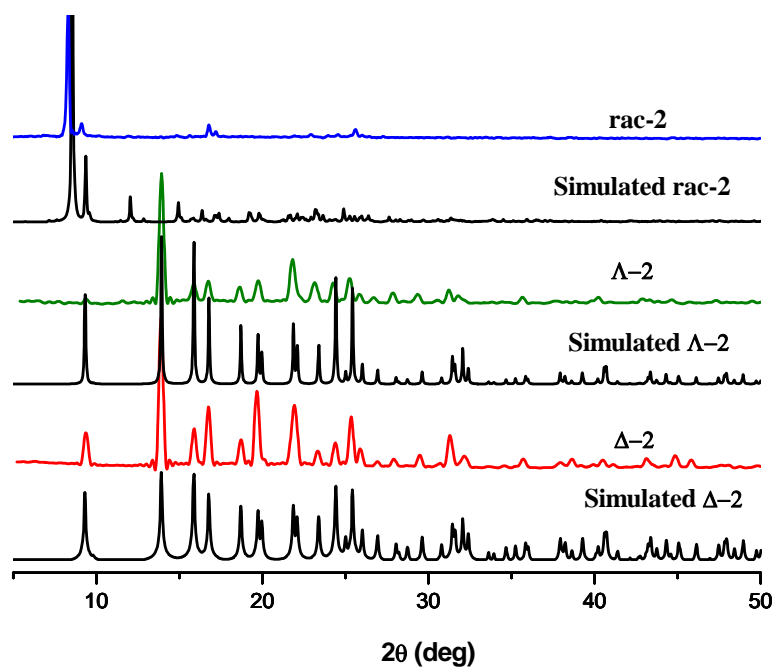

**Fig. S4.** Powder XRD patterns of the simulations based on the single-crystal analyses and as-synthesized samples of **2**.

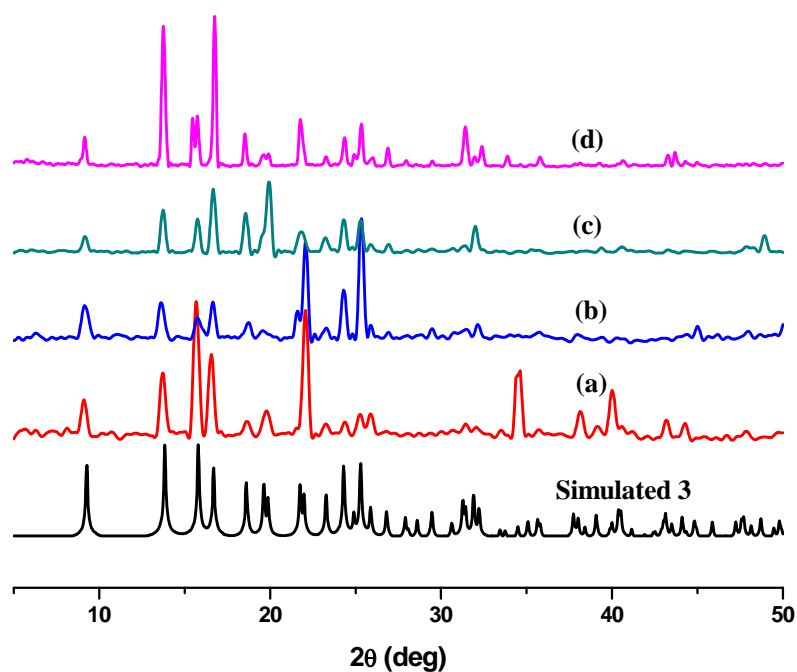

**Fig. S5.** Powder XRD patterns of the simulations based on the single-crystal analyses and as-synthesized samples of **3** from different synthesis methods.

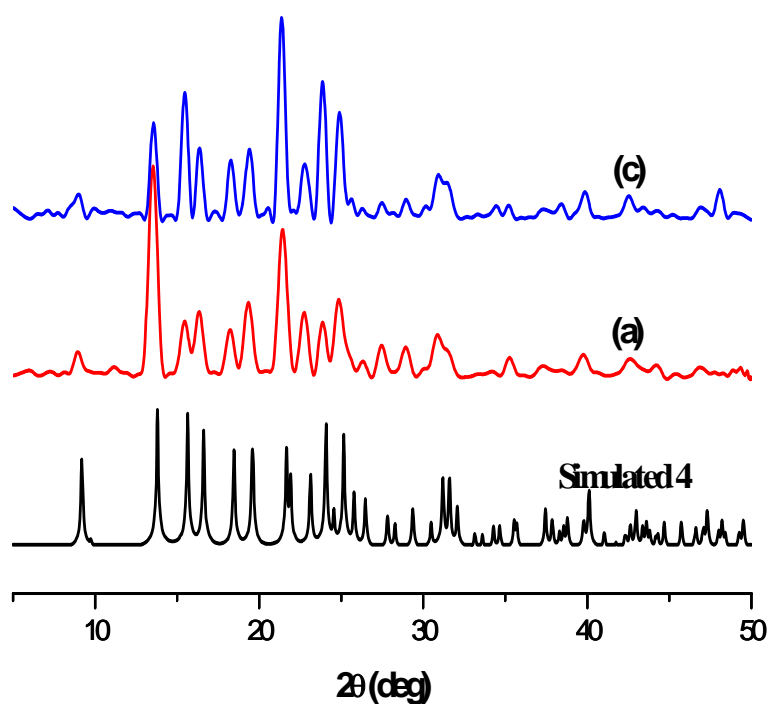

**Fig. S6.** Powder XRD patterns of the simulations based on the single-crystal analyses and as-synthesized samples of **4** from different synthesis methods.

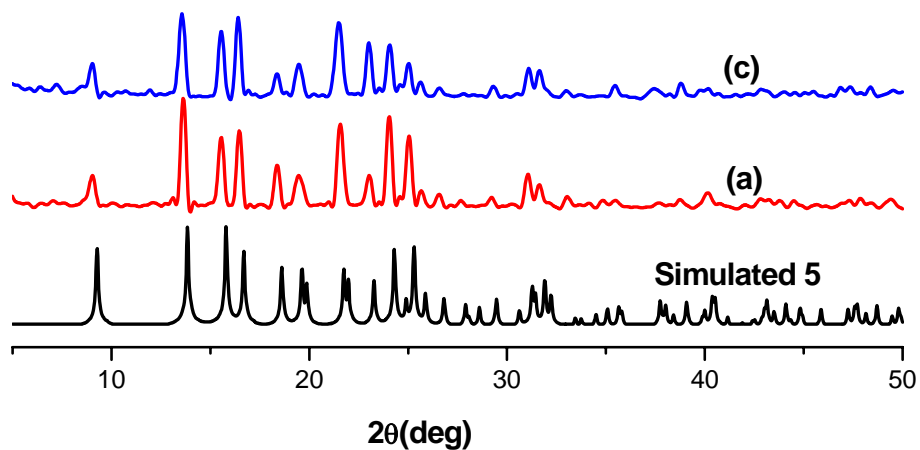

**Fig. S7.** Powder XRD patterns of the simulations based on the single-crystal analyses and as-synthesized samples of **5** form different synthesis methods.

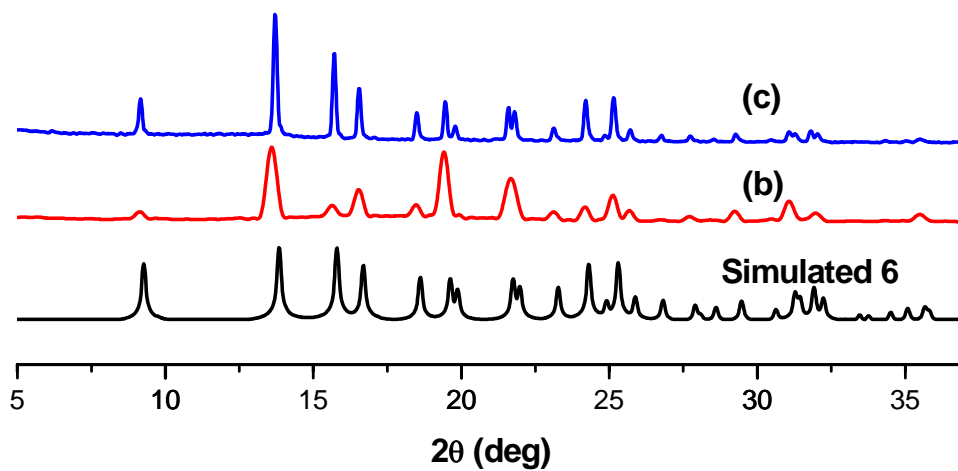

**Fig. S8.** Powder XRD patterns of the simulations based on the single-crystal analyses and as-synthesized samples of **6** form different synthesis methods.

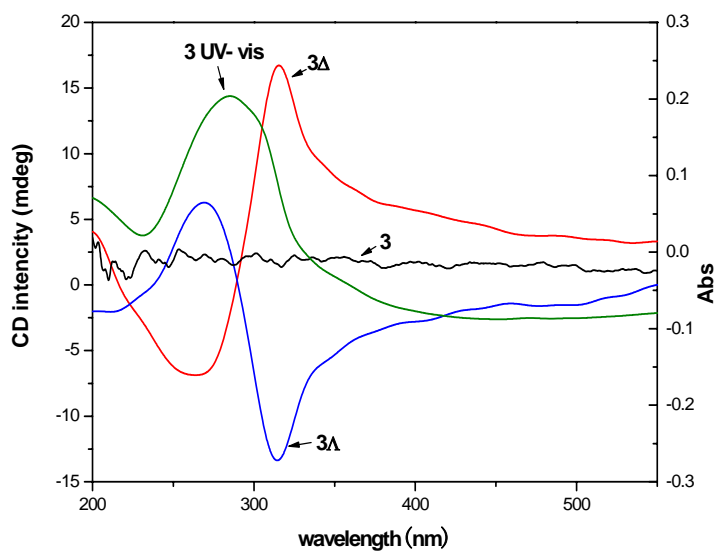

**Fig. S9.** Solid state CD spectra of a large single crystal of  $\Lambda$ -**3** (blue line),  $\Delta$ -**3** (red line), **3** (black line), and UV-vis spectra of **3** (green line) diluted with KCl.

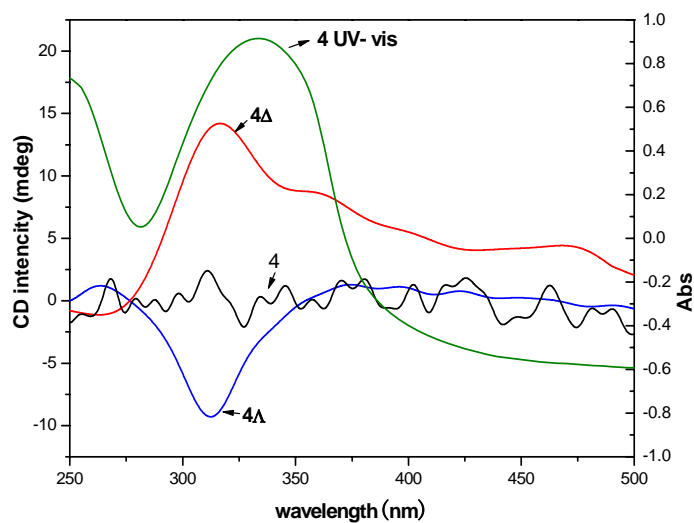

**Fig. S10.** Solid state CD spectra of a large single crystal of  $\Lambda$ -**4** (blue line),  $\Delta$ -**4** (red line), **4** (black line), and UV-vis spectra of **4** (green line) diluted with KCl.

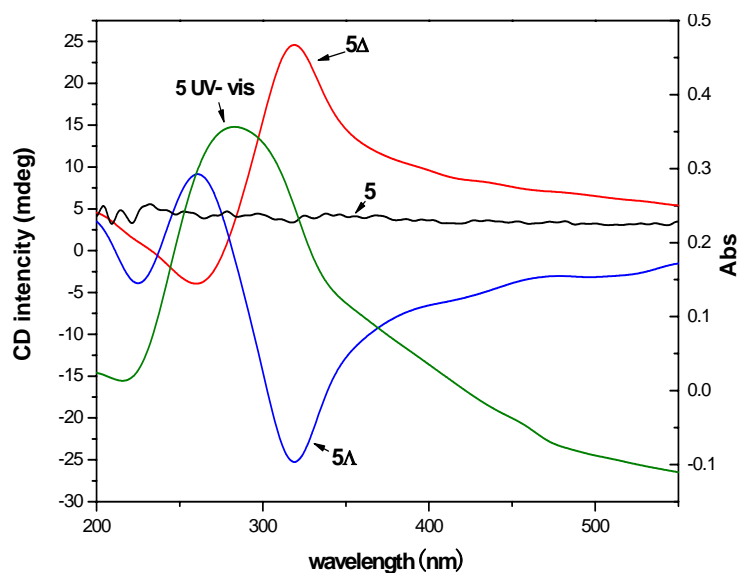

**Fig. S11.** Solid state CD spectra of a large single crystal of  $\Lambda$ -**5** (blue line),  $\Delta$ -**5** (red line), **5** (black line), and UV-vis spectra of **5** (green line) diluted with KCl.

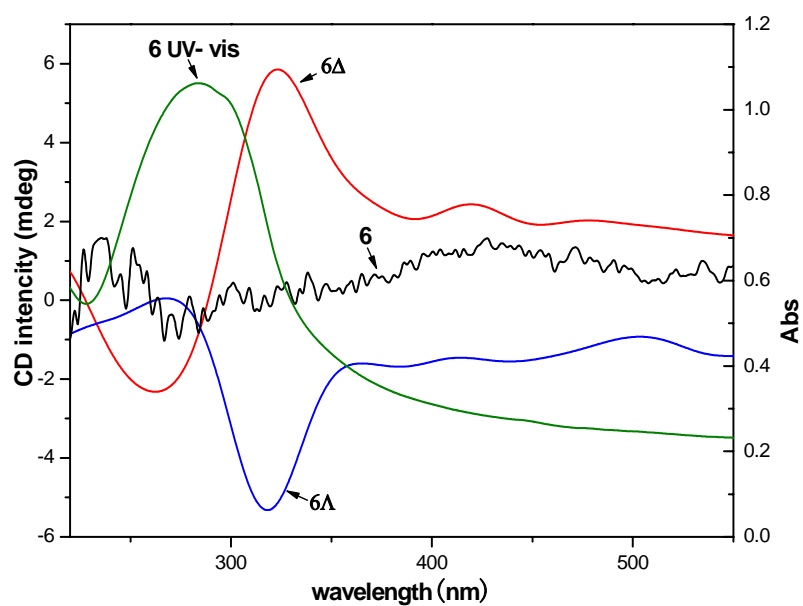

**Fig. S12.** Solid state CD spectra of a large single crystal of  $\Lambda$ -**6** (blue line),  $\Delta$ -**6** (red line), **6** (black line), and UV-vis spectra of **6** (green line) diluted with KCl.
